# Supplementary material for: One species in eight: DNA barcodes from type specimens resolve a taxonomic quagmire
Source: PubMed Central journal article supplement (PMC4964951; doi:10.1111/1755-0998.12361), 2015-01-05
Supplement: MEN-15-967-s016.pdf [file MEN-15-967-s016.pdf]

| Sample ID | Species         | BIN          | Seq. Length | GenBank Accession | Sex | Type status | Collectors                   | Collection Date | Country   | Locality                                                          |
|-----------|-----------------|--------------|-------------|-------------------|-----|-------------|------------------------------|-----------------|-----------|-------------------------------------------------------------------|
| MM0555    | Elachista OT13  | BOLD:AA83258 | 658         | HM87678           | M   |             | Jukka Tabei                  | 22-May-2009     | Spain     | Comunidad Valenciana, Alicante, Albatera 8, 5 km NNW              |
| MM0556    | Elachista OT13  | BOLD:AA83258 | 658         | HM87679           | M   |             | Jukka Tabei                  | 22-May-2009     | Spain     | Comunidad Valenciana, Alicante, Albatera 8, 5 km NNW              |
| MM0557    | Elachista OT13  | BOLD:AA83258 | 658         | HM87680           | M   |             | Jukka Tabei                  | 21-Apr-2009     | Spain     | Comunidad Valenciana, Alicante, Torrevieja                        |
| MM0558    | Elachista OT12  | BOLD:AA82139 | 658         | HM87681           | M   |             | Jukka Tabei                  | 21-Apr-2009     | Spain     | Comunidad Valenciana, Alicante, Torrevieja                        |
| MM0559    | Elachista OT12  | BOLD:AA82139 | 658         | HM87689           | M   |             | Jukka Tabei                  | 24-May-2009     | Spain     | Comunidad Valenciana, Alicante, Albatera 7 km NNW                 |
| MM0560    | Elachista OT10  | BOLD:AA62125 | 658         | HM87690           | M   |             | Jukka Tabei                  | 13-Apr-2009     | Spain     | Comunidad Valenciana, Alicante, San Miguel 3 km SW                |
| MM0561    | Elachista OT11  | BOLD:AA62125 | 658         | HQ570429          | F   |             | Jukka Tabei                  | 01-May-2009     | Spain     | Comunidad Valenciana, Alicante, San Miguel 3 km E                 |
| MM0562    | Elachista OT11  | BOLD:AA62125 | 658         | HM87691           | M   |             | Jukka Tabei                  | 12-May-2009     | Spain     | Comunidad Valenciana, Alicante, Albatera 11 km NNW                |
| MM0570    | Elachista OT13  | BOLD:AA82139 | 658         | HM87692           | F   |             | Jukka Tabei                  | 20-May-2009     | Spain     | Catalonia, Barcelona, Stiges 10 km NW                             |
| MM0571    | Elachista OT18  | BOLD:AA82133 | 658         | HQ570430          | M   |             | Jari Jumilainen              | 26-Apr-2006     | Greece    | West Macedonia, Kozani                                            |
| MM0572    | Elachista OT18  | BOLD:AA82133 | 658         | HQ570431          | M   |             | Jari Jumilainen              | 26-Apr-2006     | Greece    | West Macedonia, Kozani                                            |
| MM0576    | Elachista OT12  | BOLD:AA82139 | 538         | HM87693           | M   |             | Jukka Tabei                  | 24-May-2009     | Spain     | Comunidad Valenciana, Alicante, Albatera 7 km NNW                 |
| MM0578    | Elachista OT13  | BOLD:AA83258 | 658         | HM87695           | M   |             | Jukka Tabei                  | 12-May-2009     | Spain     | Comunidad Valenciana, Alicante, Albatera 11 km NNW                |
| MM0579    | Elachista OT13  | BOLD:AA83258 | 658         | HM87696           | M   |             | Jukka Tabei                  | 02-May-2009     | Spain     | Murcia, Suñera 7 km NW                                            |
| MM0580    | Elachista OT13  | BOLD:AA82139 | 658         | HM87697           | M   |             | Jukka Tabei                  | 23-Apr-2009     | Spain     | Comunidad Valenciana, Alicante, San Miguel 3 km SW                |
| MM0581    | Elachista OT12  | BOLD:AA82139 | 658         | HM87698           | M   |             | Jukka Tabei                  | 23-Apr-2009     | Spain     | Comunidad Valenciana, Alicante, Torremendo 3, 5 km NW             |
| MM0582    | Elachista OT12  | BOLD:AA82139 | 658         | HM87699           | M   |             | Jukka Tabei                  | 05-May-2009     | Spain     | Comunidad Valenciana, Alicante, Torremendo 3, 8 km NW             |
| MM0583    | Elachista OT12  | BOLD:AA82139 | 658         | HM87700           | M   |             | Jukka Tabei                  | 18-Mar-2010     | Spain     | Murcia, Los Belones 1 km SE                                       |
| MM0584    | Elachista OT11  | BOLD:AA62126 | 658         | HM87701           | M   |             | Jukka Tabei                  | 07-May-2009     | Spain     | Comunidad Valenciana, Alicante, San Miguel 3 km SW                |
| MM0585    | Elachista OT11  | BOLD:AA62126 | 658         | HM87702           | M   |             | Jukka Tabei                  | 01-May-2009     | Spain     | Comunidad Valenciana, Alicante, San Miguel 3 km SW                |
| MM0587    | Elachista OT13  | BOLD:AA82139 | 658         | HM87703           | M   |             | Jukka Tabei                  | 16-Apr-2009     | Spain     | Comunidad Valenciana, Alicante, San Miguel 3 km E                 |
| MM0588    | Elachista OT10  | BOLD:AA62125 | 635         | HM87704           | M   |             | Jukka Tabei                  | 16-Apr-2009     | Spain     | Comunidad Valenciana, Alicante, San Miguel 3 km SW                |
| MM0593    | Elachista OT12  | BOLD:AA82139 | 658         | HM87708           | M   |             | Jukka Tabei                  | em. 06-Apr-2010 | Spain     | Comunidad Valenciana, Alicante, San Miguel 3 km SW                |
| MM0595    | Elachista OT12  | BOLD:AA82139 | 658         | HM87710           | F   |             | Jukka Tabei                  | em. 06-Apr-2010 | Spain     | Murcia, Los Belones 1 km SE                                       |
| MM0596    | Elachista OT14  | BOLD:AA82137 | 658         | HM87711           | F   |             | Jukka Tabei                  | em. 05-Apr-2010 | Spain     | Catalonia, Barcelona, Stiges 6 km NW                              |
| MM11326   | Elachista OT12  |              | 307         | KJ130910          |     |             | H. W. V. D. Wolf             | 1997            | Spain     | Murcia, Aguilas                                                   |
| MM11327   | Elachista OT12  | BOLD:AA82139 | 658         | HM87694           |     |             | H. W. V. D. Wolf             | 1997            | Spain     | Murcia, Aguilas                                                   |
| MM11328   | Elachista OT12  | BOLD:AA82139 | 416         | KJ130924          |     |             | H. W. V. D. Wolf             | 1995            | Spain     | Murcia, Aguilas                                                   |
| MM11329   | Elachista OT12  |              | 307         | KJ130913          |     |             | H. W. V. D. Wolf             | 1995            | Spain     | Murcia, Aguilas                                                   |
| MM11330   | Elachista OT12  | BOLD:AA82139 | 658         | HM87695           |     |             | H. W. V. D. Wolf             | 1997            | Spain     | Andalusia, Almeria, Camping Cabo de Gata                          |
| MM11331   | Elachista OT12  | BOLD:AA82139 | 658         | HM87696           |     |             | Jari Jumilainen              | 2001            | Spain     | Andalusia, Almeria                                                |
| MM11332   | Elachista OT12  | BOLD:AA82139 | 658         | HM87697           |     |             | Jari Jumilainen              | 2001            | Spain     | Andalusia, Almeria                                                |
| MM11333   | Elachista OT12  | BOLD:AA82139 | 658         | HM87698           |     |             | Jari Jumilainen              | 2001            | Spain     | Andalusia, Almeria                                                |
| MM11334   | Elachista OT12  | BOLD:AA82139 | 658         | HM87699           |     |             | C. Gielis, F. K. Gielis      | 2001            | Spain     | Andalusia, Almeria, Tabernas                                      |
| MM11335   | Elachista OT12  | BOLD:AA82139 | 658         | HM87699           |     |             | C. Gielis, F. K. Gielis      | 2001            | Spain     | Andalusia, Almeria, Tabernas                                      |
| MM11340   | Elachista OT18  | BOLD:AA82133 | 658         | HM87699           |     |             | Yu Budashkin                 | 1996            | Ukraine   | Crimea, Karadagh                                                  |
| MM11341   | Elachista OT18  | BOLD:AA82133 | 658         | HM87699           |     |             | Yu Budashkin                 | 1996            | Ukraine   | Crimea, Karadagh                                                  |
| MM11343   | Elachista OT17  |              | 219         | KJ130932          |     |             | H. W. V. D. Wolf             |                 | Germany   | Rhld-Platz Kaub                                                   |
| MM11344   | Elachista OT17  | BOLD:AA82141 | 658         | HM87693           |     |             | Kimmo Silven                 | 1998            | France    | Provence-Alpes-Cote d'Azur, Alpes-Maritimes, Valle de la Vesubie  |
| MM11345   | Elachista OT17  | BOLD:AA82141 | 658         | HM87694           |     |             | Kimmo Silven                 | 1998            | France    | Provence-Alpes-Cote d'Azur, Alpes-Maritimes, St. Martin de Peille |
| MM11346   | Elachista OT15  | BOLD:AA83257 | 571         | HM87695           |     |             | C. Gielis, F. K. Gielis      | 2001            | Spain     | Andalusia, Granada, Baza                                          |
| MM11347   | Elachista OT13  | BOLD:AA82133 | 658         | HM87696           |     |             | J. -P. Kaitia                | 2003            | Macedonia | Kozani                                                            |
| MM11348   | Elachista OT18  | BOLD:AA82133 | 658         | HM87697           |     |             | J. -P. Kaitia                | 2003            | Macedonia | Kozani                                                            |
| MM11349   | Elachista OT18  | BOLD:AA82133 | 571         | KJ130899          |     |             | J. -P. Kaitia                | 2003            | Macedonia | Kozani                                                            |
| MM11350   | Elachista OT18  | BOLD:AA82134 | 658         | HM87698           |     |             | T. Baran                     | 1998            | Poland    | Glinki k. Torunia                                                 |
| MM11351   | Elachista OT18  | BOLD:AA82134 | 658         | HM87699           |     |             | T. Baran                     | 1998            | Poland    | Glinki k. Torunia                                                 |
| MM11353   | Elachista OT13  | BOLD:AA83258 | 658         | HM87700           |     |             | H. W. V. D. Wolf             | 1997            | Spain     | Murcia, Sierra d'Espuna                                           |
| MM11354   | Elachista OT13  | BOLD:AA83258 | 658         | HM87701           |     |             | H. W. V. D. Wolf             | 1997            | Spain     | Murcia, Sierra d'Espuna                                           |
| MM11355   | Elachista OT10  | BOLD:AA62125 | 658         | HM87702           |     |             | H. W. V. D. Wolf             | 2000            | Spain     | Murcia, Sierra d'Espuna                                           |
| MM11356   | Elachista OT13  | BOLD:AA83258 | 658         | HM87703           |     |             | H. W. V. D. Wolf             | 1997            | Spain     | Murcia, Sierra d'Espuna                                           |
| MM11357   | Elachista OT13  | BOLD:AA83258 | 658         | HM87704           |     |             | H. W. V. D. Wolf             | 1997            | Spain     | Murcia, Aguilas                                                   |
| MM11358   | Elachista OT13  | BOLD:AA83258 | 658         | HM87705           |     |             | H. W. V. D. Wolf             | 1997            | Spain     | Murcia, Aguilas                                                   |
| MM11359   | Elachista OT13  | BOLD:AA83258 | 658         | HM87706           |     |             | H. W. V. D. Wolf             | 1997            | Spain     | Murcia, Sierra d'Espuna                                           |
| MM11360   | Elachista OT13  | BOLD:AA83258 | 658         | HM87707           |     |             | Jari Jumilainen              | 2001            | Spain     | Andalusia, Granada, Motril                                        |
| MM11361   | Elachista OT13  | BOLD:AA83258 | 571         | HM87708           |     |             | Jari Jumilainen              | 2001            | Spain     | Andalusia, Granada, Motril                                        |
| MM11362   | Elachista OT13  | BOLD:AA83258 | 658         | HM87709           |     |             | Jari Jumilainen              | 2001            | Spain     | Andalusia, Granada, Motril                                        |
| MM11363   | Elachista OT15  | BOLD:AA83257 | 658         | HM87710           |     |             | Jari Jumilainen              | 1999            | Spain     | Andalusia, Granada, Valeta                                        |
| MM11364   | Elachista OT13  | BOLD:AA83258 | 658         | HM87711           |     |             | Jari Jumilainen              | 2002            | Spain     | Andalusia, Almeria                                                |
| MM11365   | Elachista OT13  | BOLD:AA83258 | 658         | HM87712           |     |             | Timo Nupponen, Kari Nupponen | 2002            | Spain     | Andalusia, Malaga, Ronda                                          |
| MM11366   | Elachista OT13  | BOLD:AA83258 | 658         | HM87713           |     |             | Jari Jumilainen              | 2001            | Spain     | Andalusia, Granada, Motril                                        |
| MM11367   | Elachista OT13  | BOLD:AA83258 | 656         | HM87714           |     |             | Jari Jumilainen              | 2001            | Spain     | Andalusia, Granada, Motril                                        |
| MM11368   | Elachista OT13  | BOLD:AA83258 | 658         | HM87715           |     |             | Jari Jumilainen              | 2001            | Spain     | Andalusia, Granada, Motril                                        |
| MM11369   | Elachista OT13  | BOLD:AA83258 | 658         | HM87716           |     |             | Jari Jumilainen              | 2001            | Spain     | Andalusia, Granada, Motril                                        |
| MM11370   | Elachista OT13  | BOLD:AA83258 | 658         | HM87717           |     |             | Jari Jumilainen              | 2001            | Spain     | Andalusia, Malaga, Marbella                                       |
| MM11371   | Elachista OT13  | BOLD:AA83258 | 656         | HM87718           |     |             | Jari Jumilainen              | 2001            | Spain     | Andalusia, Malaga, Marbella                                       |
| MM11372   | Elachista OT13  | BOLD:AA83258 | 658         | HM87719           |     |             | Jari Jumilainen              | 2001            | Spain     | Andalusia, Almeria                                                |
| MM11373   | Elachista OT13  | BOLD:AA83258 | 658         | HM87720           |     |             | Timo Nupponen                | 2000            | Spain     | Andalusia, Malaga, Marbella                                       |
| MM11374   | Elachista OT13  | BOLD:AA83258 | 658         | HM87721           |     |             | Jari Jumilainen              | 1999            | Spain     | Andalusia, Granada, Carataunas                                    |
| MM11375   | Elachista OT15  | BOLD:AA83257 | 658         | HM87722           |     |             | H. W. V. D. Wolf             | 2000            | Spain     | Aragon, Teruel, Cosa                                              |
| MM11376   | Elachista OT18  | BOLD:AA83195 | 658         | HM87723           |     |             | Kimmo Silven                 | 1998            | France    | Provence-Alpes-Cote d'Azur, Alpes-Maritimes, Col de Vence         |
| MM11377   | Elachista OT13  | BOLD:AA83257 | 658         | HM87724           |     |             | C. Gielis, F. K. Gielis      | 2001            | Spain     | Andalusia, Granada, Baza                                          |
| MM11378   | Elachista OT13  | BOLD:AA83258 | 658         | HM87725           |     |             | H. W. V. D. Wolf             | 1995            | Spain     | Murcia, Aguilas                                                   |
| MM11379   | Elachista OT18  | BOLD:AA82134 | 658         | HM87726           |     |             | Kari Nupponen                | 2001            | Russia    | Volgograd, Ilovla                                                 |
| MM11380   | Elachista OT18  | BOLD:AA82134 | 658         | HM87727           |     |             | Kari Nupponen                | 2005            | Russia    | Volgograd, Frolovo                                                |
| MM11381   | Elachista OT18  | BOLD:AA82134 | 658         | HM87728           |     |             | Kari Nupponen                | 2001            | Russia    | Volgograd, Ilovla                                                 |
| MM11382   | Elachista OT18  | BOLD:AA82134 | 658         | HM87729           |     |             | Kari Nupponen                | 2004            | Russia    | Orenburg, S-Ural, Orenburg/Burannoe                               |
| MM11383   | Elachista OT13  | BOLD:AA82139 | 658         | HM87730           |     |             | Kari Nupponen                | 2008            | Spain     | Orenburg, U-Liral, Orenburg/Burannoe                              |
| MM11384   | Elachista OT18  | BOLD:AA83258 | 658         | HM87731           |     |             | Jari Jumilainen              | 2004            | Spain     | Aragon, Los Monegros Caspe                                        |
| MM11405   | Elachista OT18  | BOLD:AA82133 | 658         | HM87734           |     |             | Jari Jumilainen              | 1999            | Turkey    | Kauseri, Ergiyes Dagl                                             |
| MM11406   | Elachista OT14  | BOLD:AA82137 | 621         | HM87735           |     |             | Kari Nupponen                | 2000            | Tunisia   | Atlas mnts., Le Ket/ El Ksour                                     |
| MM11407   | Elachista OT14  | BOLD:AA82137 | 658         | HM87736           |     |             | Kari Nupponen                | 2000            | Tunisia   | Atlas mnts., Maktar                                               |
| MM11408   | Elachista OT12  | BOLD:AA82139 | 657         | HM87737           |     |             | Kari Nupponen                | 2000            | Tunisia   | Nefla, (Sahara)                                                   |
| MM11409   | Elachista OT12  | BOLD:AA82139 | 657         | HM87738           |     |             | Kari Nupponen                | 2008            | Tunisia   | Nefla, (Sahara)                                                   |
| MM11411   | Elachista OT12  | BOLD:AA82139 | 658         | HM87750           |     |             | Kari Nupponen                | 2007            | Spain     | Aragon, Zaragoza, Los Monegros Gelsa                              |
| MM11412   | Elachista OT12  | BOLD:AA82139 | 658         | HM87751           |     |             | Kari Nupponen                | 2007            | Spain     | Aragon, Zaragoza, Los Monegros Gelsa                              |
| MM11413   | Elachista OT12  | BOLD:AA82139 | 658         | HM87752           |     |             | Kari Nupponen                | 2007            | Spain     | Aragon, Zaragoza, Los Monegros Gelsa                              |
| MM11414   | Elachista OT12  | BOLD:AA82139 | 658         | HM87753           |     |             | Kari Nupponen                | 2007            | Spain     | Aragon, Zaragoza, Los Monegros Gelsa                              |
| MM11415   | Elachista OT12  | BOLD:AA82139 | 658         | HM87754           |     |             | Timo Nupponen                | 2007            | Spain     | Aragon, Zaragoza, Monnegillo                                      |
| MM11417   | Elachista OT12  | BOLD:AA82141 | 657         | HM87756           |     |             | Kari Nupponen                | 2008            | Spain     | Aragon, Teniel, Villalba Baja                                     |
| MM11418   | Elachista OT12  | BOLD:AA82141 | 658         | HM87757           |     |             | Kari Nupponen                | 2008            | Spain     | Aragon, Teniel, Villalba Baja                                     |
| MM11419   | Elachista OT12  | BOLD:AA82141 | 657         | HM87758           |     |             | Kari Nupponen                | 2008            | Spain     | Castilla-La Mancha, Cuenca, Fuentes                               |
| MM11420   | Elachista OT12  | BOLD:AA82141 | 658         | HM87759           |     |             | Kari Nupponen                | 2008            | Spain     | Castilla-La Mancha, Cuenca, Fuentes                               |
| MM11421   | Elachista OT12  | BOLD:AA82141 | 624         | KJ130911          |     |             | Kari Nupponen                | 2008            | Spain     | Castilla-La Mancha, Cuenca, Fuentes                               |
| MM11422   | Elachista OT12  | BOLD:AA82141 | 584         | KJ130938          |     |             | Timo Nupponen                | 2003            | Spain     | Andalusia, Granada, Sierra Nevada                                 |
| MM11423   | Elachista OT117 | BOLD:AA84198 | 658         | KJ130939          |     |             | Timo Nupponen                | 2008            | Spain     | Andalusia, Granada, Sierra Nevada                                 |
| MM11424   | Elachista OT12  | BOLD:AA82139 | 658         | KJ130887          |     |             | Timo Nupponen, Kari Nupponen | 2002            | Spain     | Andalusia, Almeria                                                |
| MM11425   | Elachista OT12  | BOLD:AA82139 | 658         | KJ130921          |     |             | Kari Nupponen                | 2004            | Spain     | Andalusia, Almeria                                                |
| MM11426   | Elachista OT13  | BOLD:AA83258 | 658         | KJ130914          |     |             | Timo Nupponen, Kari Nupponen | 2002            | Spain     | Andalusia, Malaga, Ronda                                          |
| MM11427   | Elachista OT17  | BOLD:AA82141 | 658         | KJ130885          |     |             | Timo Nupponen                | 2003            | Spain     | Andalusia, Granada, Sierra Nevada                                 |
| MM11428   | Elachista OT12  | BOLD:AA82139 | 658         | KJ130877          |     |             | Timo Nupponen, Kari Nupponen | 2002            | Spain     | Andalusia, Almeria                                                |
| MM11429   | Elachista OT17  | BOLD:AA82141 | 658         | KJ130912          |     |             | Timo Nupponen                | 2004            | Spain     | Aragon, Teruel, Albarracia                                        |
| MM11430   | Elachista OT12  |              |             |                   |     |             |                              |                 |           |                                                                   |

|         |                                 |              |     |          |   |                 |                                |                |                                                                                 |                                                                                     |
|---------|---------------------------------|--------------|-----|----------|---|-----------------|--------------------------------|----------------|---------------------------------------------------------------------------------|-------------------------------------------------------------------------------------|
| MM16739 | Elachista OTU10                 | BOLD:AAH215  | 658 | JF847565 | F | P. Huemer       | 02-Sep-2005                    | Spain          | Comunidad Valenciana, Alicante, Sierra de Crevillente, 5 km NE Albaterra, 450 m |                                                                                     |
| MM16740 | Elachista OTU10                 | BOLD:AAH215  | 658 | JF847566 | M | P. Huemer       | 02-Sep-2005                    | Spain          | Comunidad Valenciana, Alicante, Sierra de Crevillente, 5 km NE Albaterra, 450 m |                                                                                     |
| MM16741 | Elachista OTU10                 | BOLD:AAH215  | 658 | JF847567 | M | P. Huemer       | 02-Sep-2005                    | Spain          | Comunidad Valenciana, Alicante, Sierra de Crevillente, 5 km NE Albaterra, 450 m |                                                                                     |
| MM16745 | Elachista OTU15                 | BOLD:AAH257  | 658 | JF847571 | M | P. Huemer       | 07-Sep-2005                    | Spain          | Comunidad Valenciana, Valencia, El Saler, Albufera, 5 m                         |                                                                                     |
| MM16765 | Elachista OTU15                 | BOLD:AAH257  | 658 | KJ130875 | M | Ch. Wieser      | period 8.-9.8.2006             | France         | Narbonne, Salins de Saint Lucia                                                 |                                                                                     |
| MM16766 | Elachista OTU15                 | BOLD:AAH257  | 658 | KJ130936 | M | Ch. Wieser      | period 8.-9.9.2005             | Spain          | Comunidad Valenciana, Valencia, Albufera                                        |                                                                                     |
| MM16767 | Elachista OTU15                 | BOLD:AAH257  | 658 | KJ130903 | M | Ch. Wieser      | period 8.-9.9.2005             | Spain          | Comunidad Valenciana, Alicante, Albufera                                        |                                                                                     |
| MM16771 | Elachista OTU12                 | BOLD:AAH2139 | 658 | KJ130904 | M | Ch. Wieser      | period 5.-6.9.2005             | Spain          | Comunidad Valenciana, Alicante, Santa Pola, Playa del Pinet, 5 m                |                                                                                     |
| MM16798 | Elachista OTU13                 | BOLD:AAH258  | 658 | JF853401 | M | Ch. Wieser      | 03-Sep-2005                    | Spain          | Comunidad Valenciana, Alicante, Sierra de Crevillente, 5 km NE Albaterra        |                                                                                     |
| MM16799 | Elachista OTU15                 | BOLD:AAH257  | 658 | JF853402 | M | Ch. Wieser      | 31-Aug-2005                    | France         | Narbonne, Salins de Saint Lucia, 1 m                                            |                                                                                     |
| MM16801 | Elachista OTU7                  | BOLD:AAH2141 | 656 | JF853403 | M | P. Huemer       | 31-Aug-2005                    | Spain          | Castellon, Penyagolosa N-Hang Banyadera, 1500 m                                 |                                                                                     |
| MM16833 | Elachista multipunctella        |              | 164 |          | M | holotype        | 01-May-1975                    | Austria        | Austria inf. or., Hundsheimer Berg, Porta hungarica                             |                                                                                     |
| MM16834 | Elachista skulei                |              | 164 |          | M | holotype        | 28.-29.6.1982                  | Greece         | Lakonia, Mt. Taygetos                                                           |                                                                                     |
| MM16835 | Elachista occidentella          |              | 164 |          | M | holotype        | 08-Aug-1986                    | Portugal       | Ext. 3 km E Capo da Roca                                                        |                                                                                     |
| MM16837 | Elachista vanderwolfi           |              | 56  |          | M | holotype        | H. W. v.d. Wolf                | 25.-27.7.1986  | France                                                                          | Drome, la Penneze-s-l'Ouveze                                                        |
| MM16838 | Elachista armitella             |              | 164 |          | M | holotype        | M. Glaser, W. Glaser           | 06-Jun-1985    | Turkey                                                                          | Istanbul, 50 km E. Istanbul                                                         |
| MM16839 | Elachista blancae               |              | 164 |          | M | holotype        | M. Filgzer                     | 24-Jul-1986    | Turkey                                                                          | Prov. Ankara, 20 km NW Kizilcan                                                     |
| MM16840 | Elachista casascensis           |              | 164 |          | M | holotype        | G. Balduzzi                    | 07-Aug-1984    | Italy                                                                           | Piedmont, Val Curone (Pr. AL) Poggio de Casasco                                     |
| MM16842 | Elachista bazaeila              |              | 94  |          | M | holotype        | G. Balduzzi, P. Triberti       | 25-Jul-1983    | Spain                                                                           | Andalusia, Sierra Nevada, Cam. De Veleta                                            |
| MM16843 | Elachista veletaella            |              | 56  |          | M | holotype        | E. Traugott-Olsen              | 24-Jul-1983    | Spain                                                                           | Andalusia, Sierra Nevada, Cam. De Veleta                                            |
| MM16844 | Elachista varenasi              |              | 94  |          | M | holotype        | O. Karsholt, N. P. Kristensen  | 08-Apr-1988    | France                                                                          | Var, 20 km S. St. Tropez, Cap Cartaya, Plage de l'Escalet                           |
| MM16846 | Elachista senecali              |              | 93  |          | M | holotype        | E. Traugott-Olsen              | 19-Aug-1984    | Spain                                                                           | Andalusia, Sierra Nevada, Cam. De Veleta                                            |
| MM16847 | Elachista senecali              |              | 93  |          | M | holotype        | U. Seneca                      | 13-May-1983    | Libya                                                                           | Gharian, Wadi El Hira                                                               |
| MM16848 | Elachista loveella              |              | 164 |          | M | holotype        | E. Traugott-Olsen              | 19-Aug-1984    | Spain                                                                           | Andalusia, Sierra Nevada, Cam. De Veleta                                            |
| MM16849 | Elachista wadihiraeensis        |              | 164 |          | M | holotype        | U. Seneca                      | 13-May-1983    | Libya                                                                           | Gharian, Wadi El Hira                                                               |
| MM16850 | Elachista michelbeni            |              | 56  |          | M | holotype        | Exp. ZMUC                      | 14.-16.3.1986  | Tunisia                                                                         | Nefta                                                                               |
| MM16851 | Elachista bengtsoni             |              | 325 | KJ130943 | M | holotype        | B. A. Bengtsson                | 28-Jun-1989    | Spain                                                                           | Comunidad Valenciana, Alicante, Torrevieja, Lago Jardin                             |
| MM16852 | Elachista rissanensis           |              | 164 |          | M | holotype        | Exp. ZMUC                      | 13.-14.4.1986  | Morocco                                                                         | Erfoud Rissani area                                                                 |
| MM16853 | Elachista bernellia             |              | 164 |          | M | holotype        | E. Traugott-Olsen              | 17-Jul-1987    | Spain                                                                           | Andalusia, Sierra Nevada, Cam. De Veleta                                            |
| MM16854 | Elachista olemartini            |              | 94  |          | M | holotype        | Exp. ZMUC                      | 14.-16.3.1986  | Tunisia                                                                         | Nefta                                                                               |
| MM16855 | Elachista hispanica             |              | 94  |          | M | holotype        | E. Arenberger                  | 03-Jul-1967    | Spain                                                                           | Catalonia, Collado de Falset                                                        |
| MM16857 | Elachista povovnyi              |              | 56  |          | M | holotype        | F. Kasy                        | 01-May-1976    | Austria                                                                         | Austria inf. Glaslauerriegel, S. Gumpoldskirchen                                    |
| MM16858 | Elachista intrigella            |              | 164 |          | M | holotype        | F. Kasy                        | 27-Jul-1978    | Austria                                                                         | Austria inf. or., Hundsheimer Berg, Porta hungarica                                 |
| MM16860 | Elachista niesspeteri           |              | 164 |          | M | holotype        | F. Kasy                        | 01-Aug-1970    | Austria                                                                         | Austria inf. or., Hundsheimer Berg, Porta hungarica                                 |
| MM16861 | Elachista karachi               |              | 94  |          | M | holotype        | F. Kasy                        | 23-May-1971    | Austria                                                                         | Austria inf. Glaslauerriegel, Gumpoldskirchen                                       |
| MM16863 | Elachista imbi                  |              | 164 |          | M | holotype        | F. Kasy                        | 23-Jul-1977    | Austria                                                                         | Austria inf. or., Hundsheimer Berg, Porta hungarica                                 |
| MM16866 | Elachista oukaimedenensis       |              | 94  |          | M | holotype        | F. Kasy                        | 10-Jul-1975    | Morocco                                                                         | Marrakech-Tensift-El Haouz Region, Al Haouz Province, High Atlas, 4 km E. Oukameden |
| MM16867 | Elachista glaseri               |              | 94  |          | M | holotype        | M. Glaser, W. Glaser           | 1.-2.6.1973    | Spain                                                                           | Murcia, Alhama de Murcia                                                            |
| MM16868 | Elachista maroccanensis (OTU19) | BOLD:ACD0666 | 658 | KJ130908 | M | holotype        | Exp. ZMUC                      | 12-Apr-1989    | Morocco                                                                         | Tinerhif region, - m                                                                |
| MM16869 | Elachista balduzzella           |              | 164 |          | M | holotype        | E. Traugott-Olsen              | Spain          | Andalusia, Sierra Nevada, Cam. De Veleta                                        |                                                                                     |
| MM16870 | Elachista livanasi              |              | 56  |          | M | holotype        | G. Balduzzi, P. Triberti       | 25-Jul-1983    | Spain                                                                           | Andalusia, Sierra Nevada, Cam. De Veleta                                            |
| MM16871 | Elachista rikkae                |              | 94  |          | M | holotype        | G. Balduzzi, E. Traugott-Olsen | 17-Jul-1987    | Spain                                                                           | Andalusia, Granada, Cam. Baza-Benamareul, 15 km de Baza                             |
| MM16872 | Elachista tribelliella          |              | 90  |          | M | holotype        | E. Traugott-Olsen              | 24-Jul-1983    | Spain                                                                           | Andalusia, Sierra Nevada, Cam. De Veleta                                            |
| MM16873 | Elachista gerdmanella           |              | 94  |          | M | holotype        | E. Traugott-Olsen              | 30-Oct-1982    | Spain                                                                           | Andalusia, Malaga, Camino de Ojen                                                   |
| MM16898 | Elachista OTU16                 | BOLD:AAV1042 | 658 | KJ130935 | M | P. Huemer       | 09-Aug-2010                    | Slovenia       | Julijske Alpe, Veliki Mangart                                                   |                                                                                     |
| MM16899 | Elachista OTU16                 | BOLD:AAV1042 | 658 | KJ130945 | M | P. Huemer       | 09-Aug-2011                    | Slovenia       | Julijske Alpe, Veliki Mangart                                                   |                                                                                     |
| MM16901 | Elachista OTU2                  | BOLD:AAQ0950 | 658 | KJ130950 | M | P. Buchner      | 17-Aug-2004                    | Austria        | 3 km SSW Katzedorf                                                              |                                                                                     |
| MM16902 | Elachista OTU2                  | BOLD:AAQ0950 | 307 | KJ130931 | M | P. Buchner      | 17-Aug-2004                    | Austria        | 3 km SSW Katzedorf                                                              |                                                                                     |
| MM16903 | Elachista OTU2                  | BOLD:AAQ0950 | 658 | KJ130937 | M | P. Buchner      | 03-Jul-2006                    | Austria        | Eichkogel S Moedling                                                            |                                                                                     |
| MM16904 | Elachista OTU2                  | BOLD:AAQ0950 | 658 | KJ130917 | M | P. Buchner      | 15-Sep-2006                    | Austria        | Eichkogel S Moedling                                                            |                                                                                     |
| MM16905 | Elachista OTU8                  | BOLD:AAH2134 | 658 | KJ130939 | F | P. Buchner      | 19-May-2006                    | Austria        | Wr. Neustadt West                                                               |                                                                                     |
| MM16906 | Elachista OTU2                  | BOLD:AAQ0950 | 658 | KJ130940 | M | P. Buchner      | 14-Jul-2006                    | Austria        | Eichkogel S Moedling                                                            |                                                                                     |
| MM16907 | Elachista OTU2                  | BOLD:AAQ0950 | 658 | KJ130884 | M | P. Buchner      | 24-Aug-2007                    | Austria        | Bisamberg                                                                       |                                                                                     |
| MM16908 | Elachista OTU2                  | BOLD:AAQ0950 | 634 | KJ130918 | M | P. Buchner      | 14-Jul-2006                    | Austria        | Eichkogel S Moedling                                                            |                                                                                     |
| MM18562 | Elachista OTU2                  | BOLD:AAQ0950 | 658 | KJ130895 |   | Ingvar Svensson | 01-Jun-1994                    | Sweden         | Sm, Hoegsby                                                                     |                                                                                     |
| MM19577 | Elachista OTU8                  | BOLD:AAH2134 | 621 | JN267135 |   | N. Savenkov     | 08-Jul-2000                    | Latvia         | Riga, Garkalne                                                                  |                                                                                     |
| MM19979 | Elachista OTU11                 |              | 407 | KJ130876 |   | Zdenko Tokar    |                                | Croatia        | Gospic                                                                          |                                                                                     |
| MM19992 | Elachista OTU1                  | BOLD:AAH216  | 407 | KJ130883 |   | Zdenko Tokar    |                                | Spain          | Comunidad Valenciana, Alicante, Albaterra env.                                  |                                                                                     |
| MM19998 | Elachista OTU12                 | BOLD:AAH2139 | 658 | KJ130878 |   | Zdenko Tokar    | 20.-21.4.2009                  | Spain          | Andalusia, Almeria, Tabernas env., Aghuilla Salada                              |                                                                                     |
| MM19999 | Elachista OTU12                 | BOLD:AAH2139 | 658 | KJ130929 |   | Zdenko Tokar    | 20.-21.4.2009                  | Spain          | Andalusia, Almeria, Tabernas env., Aghuilla Salada                              |                                                                                     |
| MM20049 | Elachista OTU8                  | BOLD:AAH2134 | 564 | JN267128 | M | J. Heckford     | 01-Nov-2008                    | United Kingdom | Cornwall, Downas valley                                                         |                                                                                     |
| MM20174 | Elachista OTU13                 | BOLD:AAH3258 | 658 | KJ130916 | M | J. Tabeil       | 12-Jun-2010                    | Spain          | Comunidad Valenciana, Alicante, San Miguel de Salinas 3 km SW                   |                                                                                     |
| MM20223 | Elachista OTU8                  | BOLD:AAH2134 | 658 | KJ130922 | M | N. Savenkov     | 29-Jul-2000                    | Latvia         | Riga, Garkalne                                                                  |                                                                                     |
| MM20204 | Elachista OTU12                 | BOLD:AAH2139 | 407 | KJ130928 |   | Zdenko Tokar    |                                | Spain          | Comunidad Valenciana, Alicante, Santa Pola env.                                 |                                                                                     |
| MM20207 | Elachista OTU13                 | BOLD:AAH3258 | 407 | KJ130888 |   | Zdenko Tokar    |                                | Spain          | Comunidad Valenciana, Alicante, Albaterra env.                                  |                                                                                     |
| MM20510 | Elachista OTU10                 | BOLD:AAH215  | 630 | KJ130907 |   | Zdenko Tokar    | 9.-10.7.2010                   | Spain          | Andalusia, Granada, Diezma                                                      |                                                                                     |
| MM20519 | Elachista OTU13                 | BOLD:AAH3258 | 407 | KJ130925 |   | Zdenko Tokar    |                                | Spain          | Andalusia, Almeria, Tabernas env., Aghuilla Salada                              |                                                                                     |
| MM20822 | Elachista OTU16                 | BOLD:AAV1042 | 658 | KJ130933 | M | P. Huemer       | 09-Aug-2010                    | Slovenia       | Julijske Alpe, Veliki Mangart                                                   |                                                                                     |
| MM20824 | Elachista OTU16                 | BOLD:AAV1042 | 658 | KJ130905 | M | P. Huemer       | 09-Aug-2010                    | Slovenia       | Julijske Alpe, Veliki Mangart                                                   |                                                                                     |
| MM20825 | Elachista OTU16                 | BOLD:AAV1042 | 658 | KJ130893 | M | P. Huemer       | 09-Aug-2010                    | Slovenia       | Julijske Alpe, Veliki Mangart                                                   |                                                                                     |
| MM20826 | Elachista OTU16                 | BOLD:AAV1042 | 658 | KJ130889 | M | P. Huemer       | 09-Aug-2010                    | Slovenia       | Julijske Alpe, Veliki Mangart                                                   |                                                                                     |
| MM20827 | Elachista OTU16                 | BOLD:AAV1042 | 658 | KJ130900 | M | P. Huemer       | 09-Aug-2010                    | Slovenia       | Julijske Alpe, Veliki Mangart                                                   |                                                                                     |
| MM20828 | Elachista OTU2                  | BOLD:AAQ0950 | 658 | KJ130941 | M | P. Huemer       | 01-Aug-2010                    | Italy          | Prov. Cuneo, Valdieri                                                           |                                                                                     |
| MM20829 | Elachista OTU16                 | BOLD:AAV1042 | 658 | KJ130927 | M | P. Huemer       | 13-Jun-2007                    | Italy          | Prov. Udine, Valle di Ucoea, 3 km N Ucoea                                       |                                                                                     |
| MM20840 | Elachista OTU16                 | BOLD:AAV1042 | 658 | KJ130879 | M | P. Huemer       | 09-Aug-2010                    | Spain          | Julijske Alpe, Veliki Mangart                                                   |                                                                                     |
| MM20874 | Elachista OTU12                 | BOLD:AAH2139 | 658 | KJ130892 | M | HW v.d. Wolf    | 12-Apr-1997                    | Spain          | Andalusia, Almeria, Mini-Hollywood, 6 km SW Tabernas                            |                                                                                     |
| MM20875 | Elachista OTU13                 | BOLD:AAH3258 | 658 | KJ130896 | M | HW v.d. Wolf    | 12-Apr-1997                    | Spain          | Andalusia, Almeria, Mini-Hollywood, 6 km SW Tabernas                            |                                                                                     |
| MM21349 | Elachista OTU5                  | BOLD:AAH1193 | 658 | KJ130923 | M | Z. Tokar        | 27-May-2001                    | Slovakia       | Slov.-KrasZadeli                                                                |                                                                                     |
| MM21356 | Elachista OTU8                  | BOLD:AAH2134 | 657 | KJ130908 | M | L. Simka        | 15-Aug-2003                    | Croatia        | South Velebit                                                                   |                                                                                     |
| MM21379 | Elachista OTU8                  | BOLD:AAH2134 | 658 | KJ130944 | M | Z. Tokar        | 26-May-2004                    | Hungary        | Csakbereny                                                                      |                                                                                     |
| MM21402 | Elachista OTU3                  | BOLD:ABW1969 | 658 | KJ130901 | M | Z. Tokar        | 27-Jun-2003                    | Croatia        | Tribunj                                                                         |                                                                                     |
| MM21403 | Elachista OTU2                  | BOLD:AAQ0950 | 611 | KJ130906 |   | I. Richter      | 14-May-1996                    | Slovakia       | Bojnice                                                                         |                                                                                     |
| MM21404 | Elachista OTU2                  | BOLD:AAQ0950 | 652 | KJ130919 | M | Z. Tokar        | 27-Jun-2001                    | Slovakia       | Slov. Kras-Vidova                                                               |                                                                                     |
| MM21405 | Elachista OTU2                  | BOLD:AAQ0950 | 658 | KJ130915 | M | Z. Tokar        | 24-Aug-2002                    | Slovakia       | Kasov                                                                           |                                                                                     |
| MM21406 | Elachista OTU2                  | BOLD:AAQ0950 | 658 | KJ130930 | M | Z. Tokar        | 07-Jul-2001                    | Slovakia       | Slov.kras-Turna                                                                 |                                                                                     |
| MM21418 | Elachista OTU2                  | BOLD:AAQ0950 | 658 | KJ130909 | M | Z. Tokar        | 07-Aug-2001                    | Slovakia       | Piesivecka plan                                                                 |                                                                                     |
| MM21419 | Elachista OTU2                  | BOLD:AAQ0950 | 410 | KJ130920 | M | Z. Tokar        | 04-May-2002                    | Slovakia       | Slov. Kras-Hrhov                                                                |                                                                                     |
| MM21432 | Elachista OTU1                  | BOLD:AAH216  | 658 | KJ130902 | M | J. Tabeil       | 15-May-2009                    | Spain          | 10 km NNW Albaterra                                                             |                                                                                     |
| MM21433 | Elachista OTU1                  | BOLD:AAH216  | 658 | KJ130926 | M | J. Tabeil       | 23-Apr-2009                    | Spain          | 3 km SW S. Miguel de Salinas                                                    |                                                                                     |
| MM21436 | Elachista OTU18                 | BOLD:ACE9138 | 658 | KJ130934 | M | A. Lastovka     | 21-Jul-1993                    | France         | Luberon tms., La Motte d'Aigues                                                 |                                                                                     |
